# Supplementary material for: Dietary Micronutrient Intake and Its Relationship with the Malnutrition–Inflammation–Frailty Complex in Patients Undergoing Peritoneal Dialysis
Source: MDPI journal article supplement (doi:10.3390/nu15234934), 2023-11-27
Supplement: s1 [file s1]

## Supplementary Materials

Supplementary File S1. Food Frequency Questionnaire (FFQ).

Supplementary File S2. Frailty Score (FQ).

Supplementary Table S1. Logistic regression analysis on the predictor of frailty

| <b>Factor</b>                   | <b>Adjusted odds ratio<br/>(95% confidence interval)</b> | <b>P-value</b> |
|---------------------------------|----------------------------------------------------------|----------------|
| Dietary zinc intake             | 0.96<br>(0.93 – 0.99)                                    | p = 0.009      |
| Malnutrition-Inflammation Score | 1.24<br>(1.10 – 1.39)                                    | p < 0.001      |

Covariates added into the model: age, baseline SGA score, baseline MIS score, dietary energy, protein, zinc, saturated fatty acid, calcium, and vitamin D intake.

Supplementary Table S2. Relationship between micronutrient intake and components of frailty, nutritional and inflammatory markers.

(A) Zinc intake

| <b>Frailty Score parameters</b>                          | <b>Odds ratio<br/>(95% confidence interval)</b> | <b>P-value</b> |
|----------------------------------------------------------|-------------------------------------------------|----------------|
| - Q2: Doctor consultation in the past year 6+ times      | 0.66<br>(0.53 – 0.81)                           | p < 0.001      |
| - Q3: Hospital admission in the past year 2+ times       | 0.88<br>(0.81 – 0.95)                           | p = 0.001      |
| - Q25: Need a walking aid usually                        | 0.79<br>(0.66 – 0.95)                           | p = 0.01       |
| - Q26: Walking unsteadily or stagger                     | 0.72<br>(0.54 – 0.95)                           | p = 0.02       |
| - Q27: Feeling your money/income is not enough           | 0.81<br>(0.72 – 0.91)                           | p < 0.001      |
| - Q30: Feeling unhappy most of the time in the past week | 0.92<br>(0.87 – 0.97)                           | p = 0.004      |
| <b>SGA parameters</b>                                    |                                                 |                |
| - SGA muscle                                             | 0.04<br>(0.02 – 0.07)                           | p = 0.002      |
| <b>MIS parameters</b>                                    |                                                 |                |
| - MIS A                                                  | -0.01<br>(-0.02 - -0.003)                       | p = 0.004      |

(B) Vitamin D

| <b>Frailty Score parameters</b>            | <b>Odds ratio<br/>(95% confidence interval)</b> | <b>P-value</b> |
|--------------------------------------------|-------------------------------------------------|----------------|
| - Q5: Weight loss $\geq$ 5lbs in past year | 0.53<br>(0.34 – 0.81)                           | p = 0.003      |
| - Q7: Dizziness in the past month          | 0.57<br>(0.38 – 0.86)                           | p = 0.007      |
| - Q25: Need a walking aid usually          | 0.63<br>(0.46 – 0.88)                           | p = 0.006      |
| - Q26: Walking unsteadily or stagger       | 0.36<br>(0.19 – 0.69)                           | p = 0.002      |

|                                                                 |                          |           |
|-----------------------------------------------------------------|--------------------------|-----------|
| - Q27: Feeling your money/income is not enough                  | 0.79<br>(0.66 – 0.94)    | p = 0.008 |
| - Q29: Did not participate in social activity in the past month | 0.08<br>(0.02 – 0.38)    | p = 0.001 |
| <b>MIS parameters</b>                                           |                          |           |
| - MIS B                                                         | -0.03<br>(-0.05 – 0.007) | p = 0.007 |

(C) Calcium

| <b>Frailty Score parameters</b>      | <b>Odds ratio<br/>(95% confidence interval)</b> | <b>P-value</b> |
|--------------------------------------|-------------------------------------------------|----------------|
| - Q26: Walking unsteadily or stagger | 0.99<br>(0.99 – 0.99)                           | p < 0.001      |
