# Supplementary material for: Dietary Micronutrient Intake and Its Relationship with the Malnutrition–Inflammation–Frailty Complex in Patients Undergoing Peritoneal Dialysis
Source: MDPI journal article supplement (doi:10.3390/nu15234934), 2023-11-27
Supplement: s1 [file s1]

## Food Frequency Questionnaire

**Grains**

| Type of Food                  | Code | How Often Within the Past Year? |                      |                |                       |               |                |                      |                      |           | How much each time? | Reference Portion |
|-------------------------------|------|---------------------------------|----------------------|----------------|-----------------------|---------------|----------------|----------------------|----------------------|-----------|---------------------|-------------------|
|                               |      | Never                           | A Few Times per Year | Once per Month | 2 – 3 Times per Month | Once per Week | Twice per Week | 3 – 4 Times per Week | 5 – 6 Times per Week | Every day |                     |                   |
| Rice                          | 274  |                                 |                      |                |                       |               |                |                      |                      |           | bowls               | 1 bowl = 200g     |
| Soft Rice                     | 277  |                                 |                      |                |                       |               |                |                      |                      |           | bowls               | 1 bowl = 100g     |
| Congee                        | 276  |                                 |                      |                |                       |               |                |                      |                      |           | bowls               | 1 bowl = 100g     |
| Wheat Noodles/Udon            | 270  |                                 |                      |                |                       |               |                |                      |                      |           | bowls               | 1 bowl = 200g     |
| Instant Noodles               | 272  |                                 |                      |                |                       |               |                |                      |                      |           | bowls               | 1 bowl = 200g     |
| Rice Vermicelli               | 280  |                                 |                      |                |                       |               |                |                      |                      |           | bowls               | 1 bowl = 200g     |
| Macaroni                      | 269  |                                 |                      |                |                       |               |                |                      |                      |           | bowls               | 1 bowl = 200g     |
| Pasta                         | 273  |                                 |                      |                |                       |               |                |                      |                      |           | plates              | 1 plate = 100g    |
| Oatmeal                       | 286  |                                 |                      |                |                       |               |                |                      |                      |           | bowls               | 1 bowl = 100g     |
| Corn Flakes                   | 311  |                                 |                      |                |                       |               |                |                      |                      |           | boxes               | 1 box = 25g       |
| Frosties                      | 314  |                                 |                      |                |                       |               |                |                      |                      |           | boxes               | 1 box = 25g       |
| Chinese Steam Buns (Mann-Tau) | 2023 |                                 |                      |                |                       |               |                |                      |                      |           | pieces              | 1 piece = 50g     |
| Plain rolls                   | 254  |                                 |                      |                |                       |               |                |                      |                      |           | pieces              | 1 piece = 70g     |
| White Breads                  | 251  |                                 |                      |                |                       |               |                |                      |                      |           | slices              | 1 slice = 50g     |
| White Breads (without edges)  | 251  |                                 |                      |                |                       |               |                |                      |                      |           | slices              | 1 slice = 30g     |
| Whole Wheat Breads            | 253  |                                 |                      |                |                       |               |                |                      |                      |           | slices              | 1 slice = 50g     |
| Whole Wheat Breads (no edges) | 253  |                                 |                      |                |                       |               |                |                      |                      |           | slices              | 1 slice = 30g     |
| Sweet Rolls                   | 255  |                                 |                      |                |                       |               |                |                      |                      |           | pieces              | 1 piece = 70g     |

## Vegetables & Beans

| Type of Food            | Code | How Often Within the Past Year? |                      |                |                       |               |                |                      |                      |           | How much each time? | Reference Portion |
|-------------------------|------|---------------------------------|----------------------|----------------|-----------------------|---------------|----------------|----------------------|----------------------|-----------|---------------------|-------------------|
|                         |      | Never                           | A Few Times per Year | Once per Month | 2 – 3 Times per Month | Once per Week | Twice per Week | 3 – 4 Times per Week | 5 – 6 Times per Week | Every day |                     |                   |
| Choy Sum                | 1202 |                                 |                      |                |                       |               |                |                      |                      |           | plates              | 1 plate = 100g    |
| Bok Choy                | 1201 |                                 |                      |                |                       |               |                |                      |                      |           | plates              | 1 plate = 100g    |
| Chinese Kale            | 1245 |                                 |                      |                |                       |               |                |                      |                      |           | plates              | 1 plate = 100g    |
| Broccoli                | 1207 |                                 |                      |                |                       |               |                |                      |                      |           | plates              | 1 plate = 50g     |
| Cauliflowers            | 1204 |                                 |                      |                |                       |               |                |                      |                      |           | plates              | 1 plate = 50g     |
| Chinese Spinach         | 1211 |                                 |                      |                |                       |               |                |                      |                      |           | plates              | 1 plate = 100g    |
| Watercress              | 1237 |                                 |                      |                |                       |               |                |                      |                      |           | plates              | 1 plate = 100g    |
| Spinach                 | 1270 |                                 |                      |                |                       |               |                |                      |                      |           | plates              | 1 plate = 100g    |
| Water Spinach           | 1209 |                                 |                      |                |                       |               |                |                      |                      |           | plates              | 1 plate = 100g    |
| Chinese Chives          | 1247 |                                 |                      |                |                       |               |                |                      |                      |           | plates              | 1 plate = 100g    |
| Pea Shoots              | 1242 |                                 |                      |                |                       |               |                |                      |                      |           | plates              | 1 plate = 100g    |
| Cabbages                | 1204 |                                 |                      |                |                       |               |                |                      |                      |           | plates              | 1 plate = 100g    |
| Celery Cabbages         | 1203 |                                 |                      |                |                       |               |                |                      |                      |           | plates              | 1 plate = 100g    |
| Lettuce                 | 1205 |                                 |                      |                |                       |               |                |                      |                      |           | plates              | 1 plate = 100g    |
| Asparagus               | 1238 |                                 |                      |                |                       |               |                |                      |                      |           | plates              | 1 plate = 50g     |
| Celery                  | 1203 |                                 |                      |                |                       |               |                |                      |                      |           | plates              | 1 plate = 50g     |
| Fresh Soybeans          | 1244 |                                 |                      |                |                       |               |                |                      |                      |           | servings            | 1 serving = 50g   |
| Tofu, Hard              | 1552 |                                 |                      |                |                       |               |                |                      |                      |           | servings            | 1 serving = 50g   |
| Tofu, Soft              | 1552 |                                 |                      |                |                       |               |                |                      |                      |           | cubes               | 1 cube = 300g     |
| Dried Tofu Sheets       | 1553 |                                 |                      |                |                       |               |                |                      |                      |           | servings            | 1 serving = 50g   |
| Deep Fried Tofu         | 1576 |                                 |                      |                |                       |               |                |                      |                      |           | servings            | 2 pieces = 120g   |
| Deep Fried Tofu Pockets | 1554 |                                 |                      |                |                       |               |                |                      |                      |           | pieces              | 1 piece = 16 g    |

| Type of Food          | Code | How Often Within the Past Year? |                      |                |                       |               |                |                      |                      |           | How much each time? | Reference Portion |
|-----------------------|------|---------------------------------|----------------------|----------------|-----------------------|---------------|----------------|----------------------|----------------------|-----------|---------------------|-------------------|
|                       |      | Never                           | A Few Times per Year | Once per Month | 2 – 3 Times per Month | Once per Week | Twice per Week | 3 – 4 Times per Week | 5 – 6 Times per Week | Every day |                     |                   |
| Tofu Skin             | 1556 |                                 |                      |                |                       |               |                |                      |                      |           | servings            | 1 serving = 50g   |
| Vegetarian Chicken    | 2651 |                                 |                      |                |                       |               |                |                      |                      |           | servings            | 3 pieces = 50g    |
| Wheat Gluten          | 284  |                                 |                      |                |                       |               |                |                      |                      |           | servings            | 1 serving = 50g   |
| Mungbean Sprouts      | 1222 |                                 |                      |                |                       |               |                |                      |                      |           | plates              | 1 plate = 100g    |
| Soybean Sprouts       | 1223 |                                 |                      |                |                       |               |                |                      |                      |           | plates              | 1 plate = 100g    |
| Baked Beans           | 1551 |                                 |                      |                |                       |               |                |                      |                      |           | servings            | 1 serving = 50g   |
| Red Bean (Dried)      | 1560 |                                 |                      |                |                       |               |                |                      |                      |           | servings            | 1 serving = 25g   |
| Black Eye Peas, dried | 1558 |                                 |                      |                |                       |               |                |                      |                      |           | servings            | 1 serving = 50g   |
| Snap Beans            | 1243 |                                 |                      |                |                       |               |                |                      |                      |           | plates              | 1 plate = 50g     |
| Snow Peas             | 1230 |                                 |                      |                |                       |               |                |                      |                      |           | plates              | 1 plate = 100g    |
| Green Peas            | 1215 |                                 |                      |                |                       |               |                |                      |                      |           | servings            | 1 serving = 50g   |
| Broad Beans           | 1240 |                                 |                      |                |                       |               |                |                      |                      |           | servings            | 1 serving = 50g   |
| String Beans          | 1213 |                                 |                      |                |                       |               |                |                      |                      |           | servings            | 1 serving = 50g   |
| Onions                | 1226 |                                 |                      |                |                       |               |                |                      |                      |           | servings            | 1 serving = 50g   |
| Carrots               | 1216 |                                 |                      |                |                       |               |                |                      |                      |           | servings            | 1 serving = 50g   |
| Chinese Radish        | 1246 |                                 |                      |                |                       |               |                |                      |                      |           | servings            | 1 serving = 50g   |
| Sweet Potatoes        | 1251 |                                 |                      |                |                       |               |                |                      |                      |           | servings            | 1 serving = 50g   |
| Potatoes              | 1224 |                                 |                      |                |                       |               |                |                      |                      |           | servings            | 1 serving = 50g   |
| Pumpkins              | 1253 |                                 |                      |                |                       |               |                |                      |                      |           | servings            | 1 serving = 100g  |
| Lotus Roots           | 1250 |                                 |                      |                |                       |               |                |                      |                      |           | servings            | 1 serving = 50g   |
| Water Chestnuts       | 1249 |                                 |                      |                |                       |               |                |                      |                      |           | servings            | 7 pieces = 50g    |
| Bamboo Shoots         | 1241 |                                 |                      |                |                       |               |                |                      |                      |           | servings            | 1 serving = 50g   |

| Type of Food         | Code | How Often Within the Past Year? |                      |                |                       |               |                |                      |                      |           | How much each time? | Reference Portion                 |
|----------------------|------|---------------------------------|----------------------|----------------|-----------------------|---------------|----------------|----------------------|----------------------|-----------|---------------------|-----------------------------------|
|                      |      | Never                           | A Few Times per Year | Once per Month | 2 – 3 Times per Month | Once per Week | Twice per Week | 3 – 4 Times per Week | 5 – 6 Times per Week | Every day |                     |                                   |
|                      |      |                                 |                      |                |                       |               |                |                      |                      |           |                     |                                   |
| Bitter Melons        | 1248 |                                 |                      |                |                       |               |                |                      |                      |           | servings            | 1 serving = 100g                  |
| Winter Melons        | 1212 |                                 |                      |                |                       |               |                |                      |                      |           | servings            | 1 serving = 100g                  |
| Tomatoes             | 1221 |                                 |                      |                |                       |               |                |                      |                      |           | servings            | 1 serving = 100g                  |
| Red Capsicum/pepper  | 1274 |                                 |                      |                |                       |               |                |                      |                      |           | servings            | 1 serving = 100g                  |
| Green Capsicum       | 1273 |                                 |                      |                |                       |               |                |                      |                      |           | servings            | 1 serving = 100g                  |
| Sweet Corns          | 1218 |                                 |                      |                |                       |               |                |                      |                      |           | servings            | 1 serving = 50g                   |
| Canned Corns         | 1219 |                                 |                      |                |                       |               |                |                      |                      |           | servings            | 1 serving = 50g                   |
| Angled Loofah        | 1252 |                                 |                      |                |                       |               |                |                      |                      |           | servings            | 1 serving = 100g                  |
| Eggplants            | 1239 |                                 |                      |                |                       |               |                |                      |                      |           | servings            | 1 serving = 100g                  |
| Fresh Mushrooms      | 1275 |                                 |                      |                |                       |               |                |                      |                      |           | servings            | 10 pieces = 100g                  |
| Dried Mushrooms      | 1450 |                                 |                      |                |                       |               |                |                      |                      |           | servings            | 12 pieces = 25g                   |
| Canned Mushroom      | 1453 |                                 |                      |                |                       |               |                |                      |                      |           | servings            | 8 pieces = 100g<br>3 pieces = 50g |
| White Fungus         | 1458 |                                 |                      |                |                       |               |                |                      |                      |           | servings            | 1 serving = 10g                   |
| Wood Fungus          | 1455 |                                 |                      |                |                       |               |                |                      |                      |           | servings            | 1 serving = 10g                   |
| Black Moss           | 1454 |                                 |                      |                |                       |               |                |                      |                      |           | servings            | 1 serving = 10g                   |
| Preserved Radish     | 1501 |                                 |                      |                |                       |               |                |                      |                      |           | servings            | 6 slices = 50g                    |
| Preserved Vegetables | 1503 |                                 |                      |                |                       |               |                |                      |                      |           | tablespoons         | 1 tablespoon = 5 g                |
| Preserved Greens     | 1502 |                                 |                      |                |                       |               |                |                      |                      |           | tablespoons         | 1 tablespoon = 5 g                |
| Chestnut             | 1566 |                                 |                      |                |                       |               |                |                      |                      |           | pieces              | 1 piece = 10g                     |
| Cashew Nuts          | 1564 |                                 |                      |                |                       |               |                |                      |                      |           | servings            | 1 serving = 35g                   |
| Peanut               | 1568 |                                 |                      |                |                       |               |                |                      |                      |           | servings            | 1 serving = 25g                   |

## Fruits

| Type of Food    | Code | How Often Within the Past Year? |                      |                |                       |               |                |                      |                      |           | How much each time? | Reference Portion |
|-----------------|------|---------------------------------|----------------------|----------------|-----------------------|---------------|----------------|----------------------|----------------------|-----------|---------------------|-------------------|
|                 |      | Never                           | A Few Times per Year | Once per Month | 2 – 3 Times per Month | Once per Week | Twice per Week | 3 – 4 Times per Week | 5 – 6 Times per Week | Every day |                     |                   |
| Oranges         | 1726 |                                 |                      |                |                       |               |                |                      |                      |           | pieces              | 1 piece = 150g    |
| Grapefruits     | 1706 |                                 |                      |                |                       |               |                |                      |                      |           | pieces              | 1 piece = 150g    |
| Apples          | 1701 |                                 |                      |                |                       |               |                |                      |                      |           | pieces              | 1 piece = 150g    |
| Pears           | 1717 |                                 |                      |                |                       |               |                |                      |                      |           | pieces              | 1 piece = 180g    |
| Bananas         | 1704 |                                 |                      |                |                       |               |                |                      |                      |           | pieces              | 1 piece = 200g    |
| Honeydew Melons | 1714 |                                 |                      |                |                       |               |                |                      |                      |           | servings            | 1 serving = 100g  |
| Watermelon      | 1729 |                                 |                      |                |                       |               |                |                      |                      |           | servings            | 1 serving = 100g  |
| Pineapples      | 1724 |                                 |                      |                |                       |               |                |                      |                      |           | slices              | 1 slice = 70g     |
| Strawberries    | 1734 |                                 |                      |                |                       |               |                |                      |                      |           | servings            | 4 pieces = 100g   |
| Peaches         | 1721 |                                 |                      |                |                       |               |                |                      |                      |           | pieces              | 1 piece = 200g    |
| Mangos          | 1713 |                                 |                      |                |                       |               |                |                      |                      |           | pieces              | 1 piece = 200g    |
| Persimmons      | 1728 |                                 |                      |                |                       |               |                |                      |                      |           | pieces              | 1 piece = 100g    |
| Kiwi fruits     | 1731 |                                 |                      |                |                       |               |                |                      |                      |           | pieces              | 1 piece = 75g     |
| Apricots        | 1702 |                                 |                      |                |                       |               |                |                      |                      |           | pieces              | 1 piece = 35g     |
| Prunes          | 1720 |                                 |                      |                |                       |               |                |                      |                      |           | servings            | 2 pieces = 100g   |
| Grapes          | 3082 |                                 |                      |                |                       |               |                |                      |                      |           | servings            | 10 pieces = 100g  |
| Lychee          | 1711 |                                 |                      |                |                       |               |                |                      |                      |           | servings            | 10 pieces = 100g  |
| Longans         | 1712 |                                 |                      |                |                       |               |                |                      |                      |           | servings            | 10 pieces = 30g   |
| Cherries        | 1705 |                                 |                      |                |                       |               |                |                      |                      |           | servings            | 10 pieces = 100g  |
| Papayas         | 1716 |                                 |                      |                |                       |               |                |                      |                      |           | servings            | 1 serving = 400g  |
| Pomelo          | 1733 |                                 |                      |                |                       |               |                |                      |                      |           | pieces              | 1 piece = 70g     |
| Lemons          | 1710 |                                 |                      |                |                       |               |                |                      |                      |           | pieces              | 1 piece = 100g    |

| Type of Food            | Code | How Often Within the Past Year? |                      |                |                       |               |                |                      |                      |           | How much each time? | Reference Portion |
|-------------------------|------|---------------------------------|----------------------|----------------|-----------------------|---------------|----------------|----------------------|----------------------|-----------|---------------------|-------------------|
|                         |      | Never                           | A Few Times per Year | Once per Month | 2 – 3 Times per Month | Once per Week | Twice per Week | 3 – 4 Times per Week | 5 – 6 Times per Week | Every day |                     |                   |
| Fruit Cocktail in Syrup | 1740 |                                 |                      |                |                       |               |                |                      |                      |           | servings            | 1 serving = 30g   |
| Dried Apricot           | 1703 |                                 |                      |                |                       |               |                |                      |                      |           | servings            | 10 pieces = 20g   |
| Dried Prunes            | 1725 |                                 |                      |                |                       |               |                |                      |                      |           | pieces              | 1 piece = 7g      |
| Raisins                 | 1709 |                                 |                      |                |                       |               |                |                      |                      |           | boxes               | 1 small box = 40g |
| Dried Dates             | 1732 |                                 |                      |                |                       |               |                |                      |                      |           | servings            | 15 pieces = 20g   |

## Eggs

| Type of Food     | Code | How Often Within the Past Year? |                      |                |                       |               |                |                      |                      |           | How much each time? | Reference Portion |
|------------------|------|---------------------------------|----------------------|----------------|-----------------------|---------------|----------------|----------------------|----------------------|-----------|---------------------|-------------------|
|                  |      | Never                           | A Few Times per Year | Once per Month | 2 – 3 Times per Month | Once per Week | Twice per Week | 3 – 4 Times per Week | 5 – 6 Times per Week | Every day |                     |                   |
| Hard Boiled Eggs | 1154 |                                 |                      |                |                       |               |                |                      |                      |           | pieces              | 1 piece = 50g     |
| Pan Fried Eggs   | 1155 |                                 |                      |                |                       |               |                |                      |                      |           | pieces              | 1 piece = 50g     |
| Eggs White       | 1152 |                                 |                      |                |                       |               |                |                      |                      |           | pieces              | 1 piece = 50g     |
| Century Eggs     | 1157 |                                 |                      |                |                       |               |                |                      |                      |           | pieces              | 1 piece = 50g     |
| Salted Duck Eggs | 1156 |                                 |                      |                |                       |               |                |                      |                      |           | pieces              | 1 piece = 50g     |
| Quail Eggs       | 1158 |                                 |                      |                |                       |               |                |                      |                      |           | pieces              | 1 piece = 10      |

## Meats

| Type of Food                          | Code    | How Often Within the Past Year? |                      |                |                       |               |                |                      |                      |           | How much each time? | Reference Portion |
|---------------------------------------|---------|---------------------------------|----------------------|----------------|-----------------------|---------------|----------------|----------------------|----------------------|-----------|---------------------|-------------------|
|                                       |         | Never                           | A Few Times per Year | Once per Month | 2 – 3 Times per Month | Once per Week | Twice per Week | 3 – 4 Times per Week | 5 – 6 Times per Week | Every day |                     |                   |
| BBQ pork/Pork, Lean                   | 580     |                                 |                      |                |                       |               |                |                      |                      |           | servings            | 6 pieces = 50g    |
| BBQ Pork, Lean & Fat                  | 581     |                                 |                      |                |                       |               |                |                      |                      |           | servings            | 5 pieces = 50g    |
| Spare Ribs, Lean                      | 569     |                                 |                      |                |                       |               |                |                      |                      |           | servings            | 4 pieces = 50g    |
| Spare Ribs, Lean & Fat                | 570     |                                 |                      |                |                       |               |                |                      |                      |           | servings            | 4 pieces = 50g    |
| Roast Pork, Lean                      | 566     |                                 |                      |                |                       |               |                |                      |                      |           | pieces              | 1 piece = 25g     |
| Roast Pork, Lean & Fat (with 24% fat) | 585     |                                 |                      |                |                       |               |                |                      |                      |           | pieces              | 1 piece = 25g     |
| Pork Chop, Pan Fried                  | 567     |                                 |                      |                |                       |               |                |                      |                      |           | pieces              | 1 piece = 100g    |
| Beef Flank, Stir-Fried                | 650     |                                 |                      |                |                       |               |                |                      |                      |           | servings            | 6 pieces = 50g    |
| Beef Sirloin, Pan-Fried               | 551     |                                 |                      |                |                       |               |                |                      |                      |           | Pieces              | 1 piece = 100g    |
| Briskets                              | 562     |                                 |                      |                |                       |               |                |                      |                      |           | servings            | 4 pieces = 50g    |
| Ox Tongue                             | 561     |                                 |                      |                |                       |               |                |                      |                      |           | servings            | 6 pieces = 50g    |
| Chicken, with skin                    | 602     |                                 |                      |                |                       |               |                |                      |                      |           | servings            | 1 serving = 100g  |
| Chicken, without Skin                 | 601     |                                 |                      |                |                       |               |                |                      |                      |           | servings            | 1 serving = 100g  |
| Chicken Strips, Stir-Fried            | 612     |                                 |                      |                |                       |               |                |                      |                      |           | servings            | 6 pieces = 50g    |
| Chicken wing, mid section             | 604 (m) |                                 |                      |                |                       |               |                |                      |                      |           | pieces              | 1 piece = 30g     |
| Chicken Wing, Whole                   | 604 (w) |                                 |                      |                |                       |               |                |                      |                      |           | pieces              | 1 piece = 100g    |
| Chicken Thigh                         | 608     |                                 |                      |                |                       |               |                |                      |                      |           | pieces              | 1 piece = 100g    |



| Type of Food                          | Code    | How Often Within the Past Year? |                      |                |                       |               |                |                      |                      |           | How much each time? | Reference Portion |
|---------------------------------------|---------|---------------------------------|----------------------|----------------|-----------------------|---------------|----------------|----------------------|----------------------|-----------|---------------------|-------------------|
|                                       |         | Never                           | A Few Times per Year | Once per Month | 2 – 3 Times per Month | Once per Week | Twice per Week | 3 – 4 Times per Week | 5 – 6 Times per Week | Every day |                     |                   |
| Roast Goose, with Skin                | 623     |                                 |                      |                |                       |               |                |                      |                      |           | servings            | 1 serving = 100g  |
| Roast Goose, no skin                  | 624     |                                 |                      |                |                       |               |                |                      |                      |           | servings            | 1 serving = 100g  |
| Roast Duck, with Skin                 | 620     |                                 |                      |                |                       |               |                |                      |                      |           | servings            | 1 serving = 100g  |
| Roast Duck, no skin                   | 621     |                                 |                      |                |                       |               |                |                      |                      |           | servings            | 1 serving = 100g  |
| Lamb                                  | 640     |                                 |                      |                |                       |               |                |                      |                      |           | servings            | 6 pieces = 50g    |
| Baby Pigeons                          | 630     |                                 |                      |                |                       |               |                |                      |                      |           | whole               | 1 whole = 200g    |
| Chicken Liver                         | 610     |                                 |                      |                |                       |               |                |                      |                      |           | slices              | 6 slices = 50g    |
| Chicken Heart                         | 617     |                                 |                      |                |                       |               |                |                      |                      |           | slices              | 6 slices = 50g    |
| Pig Liver                             | 571     |                                 |                      |                |                       |               |                |                      |                      |           | slices              | 6 slices = 50g    |
| Pig Heart                             | 587     |                                 |                      |                |                       |               |                |                      |                      |           | slices              | 6 slices = 50g    |
| Pig Kidneys                           | 586     |                                 |                      |                |                       |               |                |                      |                      |           | slices              | 6 slices = 50g    |
| Beef Offal                            | 2015    |                                 |                      |                |                       |               |                |                      |                      |           | slices              | 6 slices = 50g    |
| Pan Fried Hot Dogs                    | 578     |                                 |                      |                |                       |               |                |                      |                      |           | rolls               | 1 roll = 50g      |
| Big Red Sausage                       | 577     |                                 |                      |                |                       |               |                |                      |                      |           | servings            | 6 slices = 50g    |
| Chinese Sausage                       | 574     |                                 |                      |                |                       |               |                |                      |                      |           | rolls               | 1 roll = 50g      |
| Chinese liver sausage                 | 591     |                                 |                      |                |                       |               |                |                      |                      |           | rolls               | 1 roll = 50g      |
| Duck Thigh, Dried, Preserved & Salted | 620     |                                 |                      |                |                       |               |                |                      |                      |           | servings            | 1 serving = 50g   |
| Pork, Dried, Preserved & Salted       | 589     |                                 |                      |                |                       |               |                |                      |                      |           | servings            | 1 serving = 25g   |
| Ham                                   | 575     |                                 |                      |                |                       |               |                |                      |                      |           | servings            | 2 pieces = 50g    |
| Canned luncheon Meat                  | 572     |                                 |                      |                |                       |               |                |                      |                      |           | servings            | 2 pieces = 50g    |
| Hamburger Patties                     | 552 (l) |                                 |                      |                |                       |               |                |                      |                      |           | pieces              | 1 piece = 70g     |

## Fishes & Seafood

| Type of Food             | Code | How Often Within the Past Year? |                      |                |                       |               |                |                      |                      |           | How much each time? | Reference Portion |
|--------------------------|------|---------------------------------|----------------------|----------------|-----------------------|---------------|----------------|----------------------|----------------------|-----------|---------------------|-------------------|
|                          |      | Never                           | A Few Times per Year | Once per Month | 2 – 3 Times per Month | Once per Week | Twice per Week | 3 – 4 Times per Week | 5 – 6 Times per Week | Every day |                     |                   |
| Grass Fish               | 952  |                                 |                      |                |                       |               |                |                      |                      |           | servings            | 1 serving = 200g  |
| Big Head Fish            | 988  |                                 |                      |                |                       |               |                |                      |                      |           | servings            | 1 serving = 100g  |
| Mud Carp                 | 985  |                                 |                      |                |                       |               |                |                      |                      |           | servings            | 1 serving = 100g  |
| Eel                      | 975  |                                 |                      |                |                       |               |                |                      |                      |           | servings            | 10 slices = 50g   |
| Japanese eel             | 989  |                                 |                      |                |                       |               |                |                      |                      |           | servings            | 10 slices = 50g   |
| Blace                    | 982  |                                 |                      |                |                       |               |                |                      |                      |           | servings            | 1 serving = 100g  |
| Golden Thread/Horse Head | 953  |                                 |                      |                |                       |               |                |                      |                      |           | servings            | 1 serving = 100g  |
| Snake Head               | 984  |                                 |                      |                |                       |               |                |                      |                      |           | servings            | 10 slices = 50g   |
| Carp                     | 981  |                                 |                      |                |                       |               |                |                      |                      |           | servings            | 1 serving = 100g  |
| Catfish                  | 980  |                                 |                      |                |                       |               |                |                      |                      |           | servings            | 1 serving = 100g  |
| Grouper                  | 954  |                                 |                      |                |                       |               |                |                      |                      |           | servings            | 1 serving = 100g  |
| Mackerel                 | 991  |                                 |                      |                |                       |               |                |                      |                      |           | servings            | 1 serving = 100g  |
| Ribbon Fish              | 987  |                                 |                      |                |                       |               |                |                      |                      |           | servings            | 1 serving = 100g  |
| Big Eye Fish             | 992  |                                 |                      |                |                       |               |                |                      |                      |           | servings            | 1 serving = 100g  |
| Squid                    | 955  |                                 |                      |                |                       |               |                |                      |                      |           | servings            | 7 slices = 50g    |
| Oysters                  | 967  |                                 |                      |                |                       |               |                |                      |                      |           | servings            | 6 pieces = 50g    |
| Dried Oysters            | 968  |                                 |                      |                |                       |               |                |                      |                      |           | servings            | 10 pieces = 50g   |
| Prawns                   | 964  |                                 |                      |                |                       |               |                |                      |                      |           | servings            | 2 pieces = 25g    |
| Crabs                    | 969  |                                 |                      |                |                       |               |                |                      |                      |           | servings            | 1 serving = 50g   |
| Scallops/Dried Scallops  | 970  |                                 |                      |                |                       |               |                |                      |                      |           | servings            | 3 pieces = 20g    |
| Sea Cucumbers            | 976  |                                 |                      |                |                       |               |                |                      |                      |           | servings            | 1 serving = 5g    |
| Fish Balls               | 958  |                                 |                      |                |                       |               |                |                      |                      |           | servings            | 5 pieces = 100g   |

| Type of Food                     | Code | How Often Within the Past Year? |                      |                |                       |               |                |                      |                      |           | How much each time? | Reference Portion |
|----------------------------------|------|---------------------------------|----------------------|----------------|-----------------------|---------------|----------------|----------------------|----------------------|-----------|---------------------|-------------------|
|                                  |      | Never                           | A Few Times per Year | Once per Month | 2 – 3 Times per Month | Once per Week | Twice per Week | 3 – 4 Times per Week | 5 – 6 Times per Week | Every day |                     |                   |
| Fish Cakes                       | 957  |                                 |                      |                |                       |               |                |                      |                      |           | servings            | 4 slices = 50g    |
| Cuttlefish                       | 986  |                                 |                      |                |                       |               |                |                      |                      |           | servings            | 7 slices = 50g    |
| Mud Carp Fish Balls              | 985  |                                 |                      |                |                       |               |                |                      |                      |           | servings            | 2 pieces = 50g    |
| Canned Sardines                  | 961  |                                 |                      |                |                       |               |                |                      |                      |           | pieces              | 1 piece = 50g     |
| Fried Dace with Black Bean Sauce | 974  |                                 |                      |                |                       |               |                |                      |                      |           | pieces              | 1 piece = 50g     |
| Tuna Fish                        | 962  |                                 |                      |                |                       |               |                |                      |                      |           | cans                | 1/3 can = 50g     |
| Salted Preserved Fish            | 977  |                                 |                      |                |                       |               |                |                      |                      |           | slices              | 1 slice = 5g      |
| Jelly Fish                       | 978  |                                 |                      |                |                       |               |                |                      |                      |           | servings            | 1 serving = 50g   |
| Salmons                          | 990  |                                 |                      |                |                       |               |                |                      |                      |           | pieces              | 5 pieces = 100g   |

## Dairy Products & Beverages

| Type of Food        | Code         | How Often Within the Past Year? |                      |                |                       |               |                |                      |                      |           | How much each time? | Reference Portion  |
|---------------------|--------------|---------------------------------|----------------------|----------------|-----------------------|---------------|----------------|----------------------|----------------------|-----------|---------------------|--------------------|
|                     |              | Never                           | A Few Times per Year | Once per Month | 2 – 3 Times per Month | Once per Week | Twice per Week | 3 – 4 Times per Week | 5 – 6 Times per Week | Every day |                     |                    |
| Whole Milk          | 76           |                                 |                      |                |                       |               |                |                      |                      |           | cups                | 1 cup = 250ml      |
| Skimmed Milk        | 79           |                                 |                      |                |                       |               |                |                      |                      |           | cups                | 1 cup = 250ml      |
| Chocolate Milk      | 78           |                                 |                      |                |                       |               |                |                      |                      |           | cups                | 1 cup = 250ml      |
| Whole Milk Powder   | 82           |                                 |                      |                |                       |               |                |                      |                      |           | tablespoons         | 1 Tablespoon = 7g  |
| Skimmed Milk Powder | 83           |                                 |                      |                |                       |               |                |                      |                      |           | tablespoons         | 1 Tablespoon = 7g  |
| Condensed Milk      | 80           |                                 |                      |                |                       |               |                |                      |                      |           | tablespoons         | 1 Tablespoon = 20g |
| Evaporated Milk     | 81           |                                 |                      |                |                       |               |                |                      |                      |           | tablespoons         | 1 Tablespoon = 15g |
| Cheese              | 95           |                                 |                      |                |                       |               |                |                      |                      |           | slices              | 1 slice = 20g      |
| Whole Fat Yogurt    | 111          |                                 |                      |                |                       |               |                |                      |                      |           | cups                | 1 cup = 150g       |
| Low Fat Yogurt      | 112          |                                 |                      |                |                       |               |                |                      |                      |           | cups                | 1 cup = 150g       |
| Ice Cream           | 99<br>(c)    |                                 |                      |                |                       |               |                |                      |                      |           | cups                | 1 cup = 134ml      |
| Ice Cream Cone      | 99<br>(cone) |                                 |                      |                |                       |               |                |                      |                      |           | cones               | 1 cone = 70g       |
| Milk Shake          | 2117         |                                 |                      |                |                       |               |                |                      |                      |           | cups                | 1 cup = 300ml      |
| Mayonnaise          | 2456         |                                 |                      |                |                       |               |                |                      |                      |           | tablespoons         | 1 tablespoon = 15g |
| Chocolate Powder    | 2267         |                                 |                      |                |                       |               |                |                      |                      |           | tablespoons         | 1 Tbsp = 5 g       |
| Horlick             | 2268         |                                 |                      |                |                       |               |                |                      |                      |           | tablespoons         | 1 Tbsp = 5 g       |
| Ovaltine            | 2269         |                                 |                      |                |                       |               |                |                      |                      |           | tablespoons         | 1 Tbsp = 5 g       |
| Coca Cola           | 2251         |                                 |                      |                |                       |               |                |                      |                      |           | cans                | 1 can = 350ml      |
| Other sodas         | 2252         |                                 |                      |                |                       |               |                |                      |                      |           | cans                | 1 can = 350ml      |
| Diet coke           | 2254         |                                 |                      |                |                       |               |                |                      |                      |           |                     |                    |
| Fanta Orange        | 2253         |                                 |                      |                |                       |               |                |                      |                      |           |                     |                    |
| Sprite              |              |                                 |                      |                |                       |               |                |                      |                      |           |                     |                    |
| Yakult              | 2260         |                                 |                      |                |                       |               |                |                      |                      |           | bottles             | 1 bottle = 100g    |
| Coconut Juice       | 2293         |                                 |                      |                |                       |               |                |                      |                      |           | cups                | 1 cup = 250ml      |

| Type of Food            | Code     | How Often Within the Past Year? |                      |                |                       |               |                |                      |                      |           | How much each time? | Reference Portion |
|-------------------------|----------|---------------------------------|----------------------|----------------|-----------------------|---------------|----------------|----------------------|----------------------|-----------|---------------------|-------------------|
|                         |          | Never                           | A Few Times per Year | Once per Month | 2 – 3 Times per Month | Once per Week | Twice per Week | 3 – 4 Times per Week | 5 – 6 Times per Week | Every day |                     |                   |
| Vitasoy                 | 2261 (s) |                                 |                      |                |                       |               |                |                      |                      |           | packs               | 1 pack = 250ml    |
| Fresh Fruit Juices      | 2298     |                                 |                      |                |                       |               |                |                      |                      |           | cups                | 1 cup = 250ml     |
| Canned/Bottled Juices   | 2301     |                                 |                      |                |                       |               |                |                      |                      |           | packs               | 1 pack = 250ml    |
| Soy Milk                | 2292     |                                 |                      |                |                       |               |                |                      |                      |           | cups                | 1 cup = 250ml     |
| Sweetened Carton drinks | 3016     |                                 |                      |                |                       |               |                |                      |                      |           | packs               | 1 pack = 250ml    |
| Chinese Tea             | 2282     |                                 |                      |                |                       |               |                |                      |                      |           | cups                | 1 cup = 250ml     |
| Green Tea               | 2272     |                                 |                      |                |                       |               |                |                      |                      |           | cups                | 1 cup = 250ml     |
| English Tea             | 2306     |                                 |                      |                |                       |               |                |                      |                      |           | cups                | 1 cup = 250ml     |
| Coffee                  | 2273     |                                 |                      |                |                       |               |                |                      |                      |           | cups                | 1 cup = 250ml     |
| Wine                    | 2276     |                                 |                      |                |                       |               |                |                      |                      |           | cups                | 1 cup = 250ml     |
| Spirits                 | 2276     |                                 |                      |                |                       |               |                |                      |                      |           | cups                | 1 cup = 250ml     |
| Light Beer              | 2275     |                                 |                      |                |                       |               |                |                      |                      |           | cups                | 1 cup = 250ml     |
| Beer                    | 2274     |                                 |                      |                |                       |               |                |                      |                      |           | cups                | 1 cup = 250ml     |
| Chinese wine            | 2277     |                                 |                      |                |                       |               |                |                      |                      |           | cups                | 1 cup = 250ml     |
| Mineral Water           | 2305     |                                 |                      |                |                       |               |                |                      |                      |           | cups                | 1 cup = 250ml     |
| Plain Water             | W1       |                                 |                      |                |                       |               |                |                      |                      |           | cups                | 1 cup = 250ml     |

## Snacks

| Type of Food                                   | Code       | How Often Within the Past Year? |                      |                |                       |               |                |                      |                      |           | How much each time? | Reference Portion |
|------------------------------------------------|------------|---------------------------------|----------------------|----------------|-----------------------|---------------|----------------|----------------------|----------------------|-----------|---------------------|-------------------|
|                                                |            | Never                           | A Few Times per Year | Once per Month | 2 – 3 Times per Month | Once per Week | Twice per Week | 3 – 4 Times per Week | 5 – 6 Times per Week | Every day |                     |                   |
| Wonton                                         | 3066       |                                 |                      |                |                       |               |                |                      |                      |           | pieces              | 1 piece = 20g     |
| BBQ Pork Bun                                   | 2004       |                                 |                      |                |                       |               |                |                      |                      |           | pieces              | 1 piece = 75g     |
| Sweet Bun w/ Lotus Seed Paste/Egg Yolk Filling | 2009       |                                 |                      |                |                       |               |                |                      |                      |           | pieces              | 1 piece = 40g     |
| Steamed Dim Sum                                | 3060       |                                 |                      |                |                       |               |                |                      |                      |           | pieces              | 1 piece = 20g     |
| Deep Fried Dumplings                           | 3064       |                                 |                      |                |                       |               |                |                      |                      |           | pieces              | 1 piece = 35g     |
| Steamed Cheung Fan (Steamed Rice Rolls)        | 3062       |                                 |                      |                |                       |               |                |                      |                      |           | pieces              | 1 piece = 60g     |
| Chinese Turnip Cake                            | 2018       |                                 |                      |                |                       |               |                |                      |                      |           | pieces              | 1 piece = 40g     |
| Chicken Paw                                    | 2010       |                                 |                      |                |                       |               |                |                      |                      |           | pieces              | 1 plate = 25g     |
| “Yau-Char-Kwai” (Deep Fried Dough)             | 2020       |                                 |                      |                |                       |               |                |                      |                      |           | pieces              | 1 piece = 70g     |
| Pizza                                          | 2134       |                                 |                      |                |                       |               |                |                      |                      |           | pieces              | 1 piece = 120g    |
| Hamburger                                      | 2101       |                                 |                      |                |                       |               |                |                      |                      |           | pieces              | 1 piece = 100g    |
| Fish Burger                                    | 2109       |                                 |                      |                |                       |               |                |                      |                      |           | pieces              | 1 piece = 140g    |
| Chicken Nuggets                                | 2108       |                                 |                      |                |                       |               |                |                      |                      |           | pieces              | 1 piece = 20g     |
| Hash Brown                                     | 2121       |                                 |                      |                |                       |               |                |                      |                      |           | pieces              | 1 piece = 50g     |
| Pork Pie                                       | 2042       |                                 |                      |                |                       |               |                |                      |                      |           | pieces              | 1 piece = 100g    |
| Apple Pie                                      | 2112       |                                 |                      |                |                       |               |                |                      |                      |           | pieces              | 1 piece = 100g    |
| Glazed Beef Jerky                              | 564        |                                 |                      |                |                       |               |                |                      |                      |           | pieces              | 3 pieces = 100g   |
| Glazed Pork Jerky                              | 579        |                                 |                      |                |                       |               |                |                      |                      |           | pieces              | 3 pieces = 100g   |
| Beef Floss                                     | 563        |                                 |                      |                |                       |               |                |                      |                      |           | packs               | 1 pack = 25g      |
| Pork Floss                                     | 579 (pack) |                                 |                      |                |                       |               |                |                      |                      |           | packs               | 1 pack = 25g      |
| Dried Squid Strings                            | 956        |                                 |                      |                |                       |               |                |                      |                      |           | packs               | 1 pack = 20g      |

| Type of Food                | Code    | How Often Within the Past Year? |                      |                |                       |               |                |                      |                      |           | How much each time? | Reference Portion  |
|-----------------------------|---------|---------------------------------|----------------------|----------------|-----------------------|---------------|----------------|----------------------|----------------------|-----------|---------------------|--------------------|
|                             |         | Never                           | A Few Times per Year | Once per Month | 2 – 3 Times per Month | Once per Week | Twice per Week | 3 – 4 Times per Week | 5 – 6 Times per Week | Every day |                     |                    |
| Chinese Sweet Soup Desserts | 2016    |                                 |                      |                |                       |               |                |                      |                      |           | bowls               | 1 bowl = 200g      |
| Tofu Fa                     | 1555    |                                 |                      |                |                       |               |                |                      |                      |           | bowls               | 1 bowl = 200g      |
| Saltines/Cream Crackers     | 287     |                                 |                      |                |                       |               |                |                      |                      |           | servings            | 3 pieces = 25g     |
| Semi-sweet Biscuits         | 292     |                                 |                      |                |                       |               |                |                      |                      |           | servings            | 2 pieces = 20g     |
| Chocolate Coated Biscuits   | 295     |                                 |                      |                |                       |               |                |                      |                      |           | pieces              | 3 pieces = 40g     |
| Walnut Short Cakes          | 2040    |                                 |                      |                |                       |               |                |                      |                      |           | pieces              | 1 piece = 150g     |
| Milk Pudding                | 120     |                                 |                      |                |                       |               |                |                      |                      |           | cups                | 1 cup = 120g       |
| Egg Tart                    | 302 (l) |                                 |                      |                |                       |               |                |                      |                      |           | pieces              | 1 piece = 60g      |
| French Fries                | 2110    |                                 |                      |                |                       |               |                |                      |                      |           | servings            | 1 serving = 100g   |
| Potato Chips                | 2467    |                                 |                      |                |                       |               |                |                      |                      |           | packs               | 1 small pack = 35g |
| Spongy Cake                 | 301     |                                 |                      |                |                       |               |                |                      |                      |           | pieces              | 1 piece = 70g      |
| Pound Cake                  | 300     |                                 |                      |                |                       |               |                |                      |                      |           | slices              | 1 slice = 80g      |
| Milk Chocolate              | 2461    |                                 |                      |                |                       |               |                |                      |                      |           | pieces              | 1 piece = 10g      |
| Candies                     | 3017    |                                 |                      |                |                       |               |                |                      |                      |           | pieces              | 2 pieces = 20g     |
| Honey                       | 2452    |                                 |                      |                |                       |               |                |                      |                      |           | tablespoons         | 1 tablespoon = 20g |
| Jam                         | 2453    |                                 |                      |                |                       |               |                |                      |                      |           | tablespoons         | 1 tablespoon = 20g |
| Peanut Butter               | 2454    |                                 |                      |                |                       |               |                |                      |                      |           | tablespoons         | 1 tablespoon = 15g |
| Corn Syrup                  | 2457    |                                 |                      |                |                       |               |                |                      |                      |           | tablespoons         | 1 tablespoon = 20g |

## Soups

| Type of Food                 | Code | How Often Within the Past Year? |                      |                |                       |               |                |                      |                      |           | How much each time? | Reference Portion |
|------------------------------|------|---------------------------------|----------------------|----------------|-----------------------|---------------|----------------|----------------------|----------------------|-----------|---------------------|-------------------|
|                              |      | Never                           | A Few Times per Year | Once per Month | 2 – 3 Times per Month | Once per Week | Twice per Week | 3 – 4 Times per Week | 5 – 6 Times per Week | Every day |                     |                   |
| Herbs & Lean Pork Soup       | J1   |                                 |                      |                |                       |               |                |                      |                      |           | bowls               | 1 bowl = 200ml    |
| Carrots & Green Turnips Soup | J1   |                                 |                      |                |                       |               |                |                      |                      |           | bowls               | 1 bowl = 200ml    |
| Watercress Soup              | J1   |                                 |                      |                |                       |               |                |                      |                      |           | bowls               | 1 bowl = 200ml    |
| Radish & Mud Carp Dace Soup  | J1   |                                 |                      |                |                       |               |                |                      |                      |           | bowls               | 1 bowl = 200ml    |
| Cabbages & Potatoes Soup     | J1   |                                 |                      |                |                       |               |                |                      |                      |           | bowls               | 1 bowl = 200ml    |
| Peanuts Chicken Paws Soup    | J1   |                                 |                      |                |                       |               |                |                      |                      |           | bowls               | 1 bowl = 200ml    |
| Split Peas & Peanut Soup     | J1   |                                 |                      |                |                       |               |                |                      |                      |           | bowls               | 1 bowl = 200ml    |
| Hairy Melons & Octopus Soup  | J1   |                                 |                      |                |                       |               |                |                      |                      |           | bowls               | 1 bowl = 200ml    |
| Cream of Chicken Soup        | J1   |                                 |                      |                |                       |               |                |                      |                      |           | bowls               | 1 bowl = 200ml    |
| Vegetable & Tofu Soup        | J1   |                                 |                      |                |                       |               |                |                      |                      |           | bowls               | 1 bowl = 200ml    |
