# Supplementary material for: Dietary Micronutrient Intake and Its Relationship with the Malnutrition–Inflammation–Frailty Complex in Patients Undergoing Peritoneal Dialysis
Source: MDPI journal article supplement (doi:10.3390/nu15234934), 2023-11-27
Supplement: s1 [file s1]

## Simplified Frailty Assessment Questionnaire

Name: \_\_\_\_\_

Date: \_\_\_\_\_

| Question                                                        | Answer |
|-----------------------------------------------------------------|--------|
| Q1. Self perceived physical health not quite good/poor          | Y / N  |
| Q2. Doctor consultation in the past year 6+ times               | Y / N  |
| Q3. Hospital admission in the past year 2+ times                | Y / N  |
| Q4. No. of drug use 5+                                          | Y / N  |
| Q5. Weight loss for $\geq 5$ lbs                                | Y / N  |
| Q6. Headache in the past month                                  | Y / N  |
| Q7. Dizziness in the past month                                 | Y / N  |
| Q8. Have joint pain in the past month                           | Y / N  |
| Q9. Feeling tired in the past month                             | Y / N  |
| Q10. Falls in the past year: 1-2 times                          | Y / N  |
| Q11: Falls in the past year: 3+ times                           | Y / N  |
| Q12: Have chest pain while walking uphill or briskly            | Y / N  |
| Q13. Have chest pain while walking on level ground              | Y / N  |
| Q14. Cannot walk for 1 mile                                     | Y / N  |
| Q15. Cannot walk for 100 yards                                  | Y / N  |
| Q16. Wheezing or whistling in chest in the past year            | Y / N  |
| Q17. Wake up with a feeling of chest tightness in the past year | Y / N  |
| Q18. Cough up phlegm for 3 consecutive months for 2 years       | Y / N  |
| Q19. Dependent in bathing                                       | Y / N  |
| Q20. Dependent in changing clothes                              | Y / N  |
| Q21. Dependent in personal grooming                             | Y / N  |
| Q22. Dependent in taking medicine                               | Y / N  |
| Q23. Dependent in doing housework                               | Y / N  |
| Q24. Dependent in doing shopping                                | Y / N  |
| Q25. Need a walking aid usually                                 | Y / N  |
| Q26. Walking unsteadily or stagger                              | Y / N  |
| Q27. Feeling your money / income is not enough                  | Y / N  |
| Q28. Exercise less than 20 minutes each day                     | Y / N  |
| Q29. Did not participate in social activity in the past month   | Y / N  |
| Q30. Feeling unhappy most of the time in the past week          | Y / N  |

Total score: \_\_\_\_\_
